# Supplementary material for: Co-Prussian blue analogue supported on graphene-based materials as an electrocatalyst for OER at neutral pH
Source: Royal Society of Chemistry journal article supplement (doi:10.1039/d3ya00483j), 2023-12-26
Supplement: d3ya00483j1.pdf [file d3ya00483j1.pdf]

## SUPPORTING INFORMATION

### **Co-Prussian blue analogue supported on graphene-based material as electrocatalyst for oxygen evolution reaction under neutral pH**

Rafael G. Yoshimura<sup>a</sup>, Thiago V. de B. Ferraz<sup>a</sup>, Priscilla J. Zambiasi<sup>a</sup>, Juliano A. Bonacin<sup>\*a</sup>

*<sup>a</sup>Instituto de Química, Universidade Estadual de Campinas, 13083-970, Campinas, SP,  
Brazil 6154, 13084-971, Campinas, SP, Brazil*

\*jbonacin@unicamp.br (e-mail of the corresponding author)

ORCID ID: 0000-0001-9399-1031

Table S1. The positions of the D and G bands on Raman spectra of the graphene-based samples.

| Sample  | D band ( $\text{cm}^{-1}$ ) | G band ( $\text{cm}^{-1}$ ) |
|---------|-----------------------------|-----------------------------|
| GO      | 1349                        | 1600                        |
| r_GO    | 1346                        | 1592                        |
| r_GO_N1 | 1348                        | 1596                        |
| r_GO_N2 | 1348                        | 1593                        |
| r_GO_N3 | 1348                        | 1593                        |

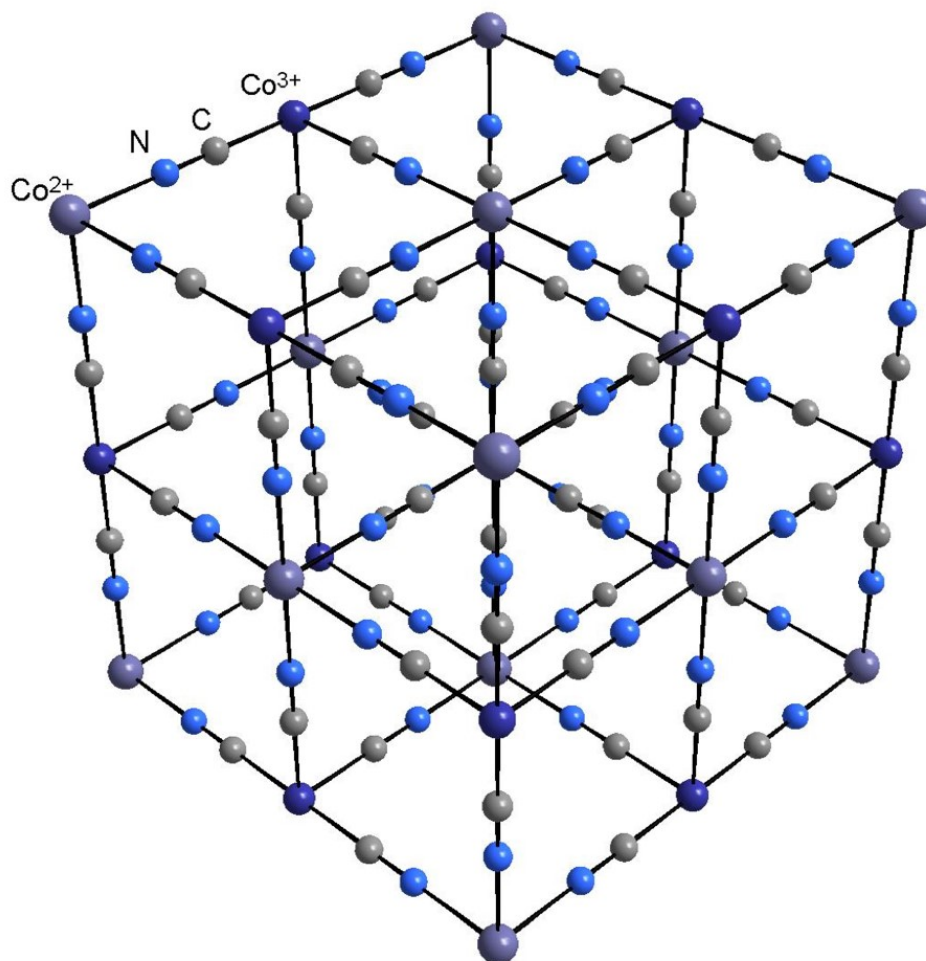

Figure S1. A schematic structure view of Co-PBA.

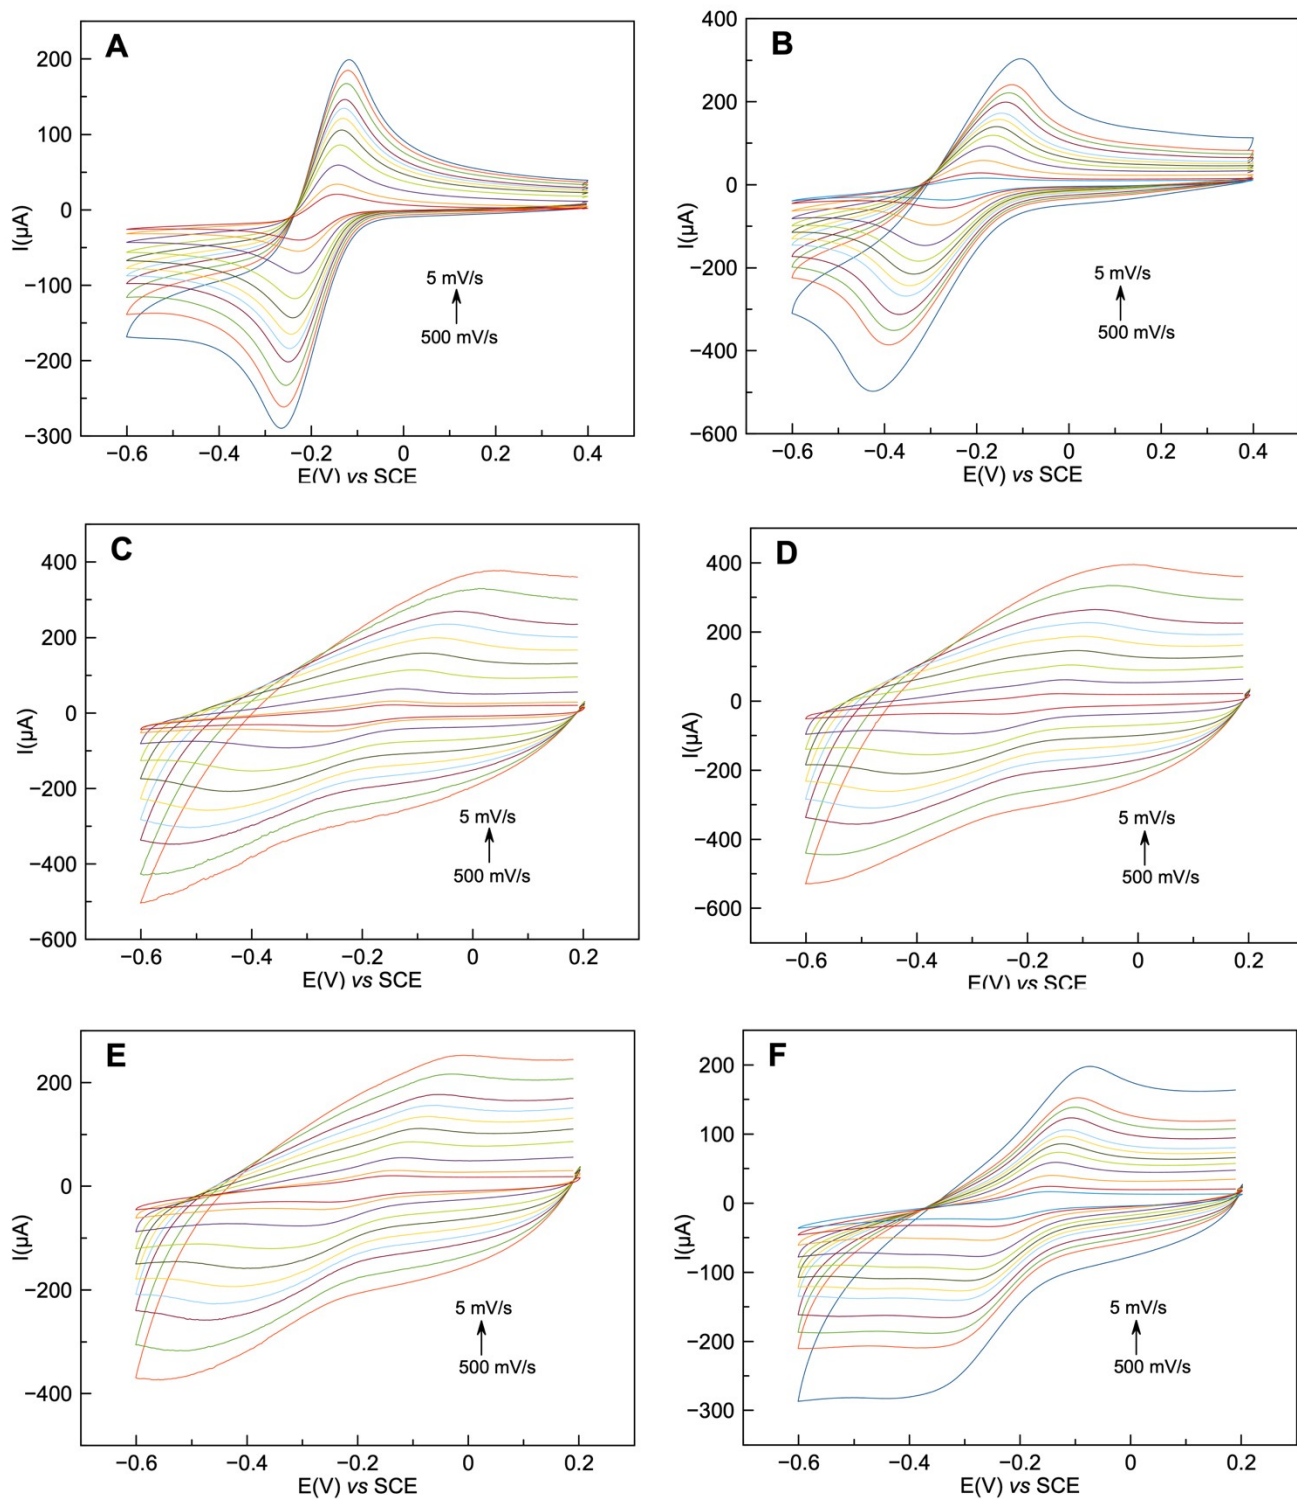

Figure S2. Cyclic voltammograms at different scan rates (500 to 5 mV.s<sup>-1</sup>) to determine the electroactive surface area (ECSA) and heterogenous rate constant ( $k_{\text{obs}}$ ) in a solution containing 5mmol.L<sup>-1</sup> [Ru(NH<sub>3</sub>)<sub>6</sub>]<sup>3+</sup> as redox probe and 0.1 mol.L<sup>-1</sup> KNO<sub>3</sub> as support electrolyte. (A) Co-PBA (B) GO, (C) r\_GO, (D) r\_GO N1, (E) r\_GO N2 and (F) r\_GO N3.

Table S2. Comparison of some electrocatalysts for OER under mild conditions

| Electrocatalyst                                      | Electrolyte            | $\eta$ J <sub>10</sub> (mV) | Tafel slope (mV dec <sup>-1</sup> ) | Ref       |
|------------------------------------------------------|------------------------|-----------------------------|-------------------------------------|-----------|
| Co-PBA + r_GO N2                                     | 0.1 M KNO <sub>3</sub> | 926                         | 180                                 | This work |
| Co-Fe PBA                                            | 0.5 M KNO <sub>3</sub> | 970                         | 151                                 | 1         |
| Co-PBA                                               | 0.1 M Kpi              | 1141                        | 155                                 | 2         |
| Co <sub>3</sub> O <sub>4</sub>                       | 0.1 M Kpi              | 931                         | 138                                 | 2         |
| Ni(S <sub>0.5</sub> Se <sub>0.5</sub> ) <sub>2</sub> | 1.0 M PBS              | 640                         | 94                                  | 3         |
| CoP                                                  | 1.0 M PBS              | 536                         | 85                                  | 4         |
| Co <sub>3</sub> O <sub>4</sub> + graphene            | 0.1 M PBS              | 498                         | 98                                  | 5         |
| S-NiFe <sub>2</sub> O <sub>4</sub>                   | 1.0 PBS                | 494                         | 118                                 | 6         |

## References

- [1] R. Germscheidt, D. Francischini, M. Silva, M. Arruda, A. Formiga, T. Rocha, J. Bonacin. *ACS Appl. Energy Mater.*, 2022, **5**, 9447–9454.
- [2] P. Zambiazzi, G. Aparecido, T. Ferraz, W. Skinner, R. Yoshimura, D. Moreira, R. Germscheidt, L. Nascimento, A. Patrocinio, A. Formiga, J. Bonacin. *Dalton Trans.*, 2020, **49**, 16488–16497.
- [3] L. Zeng, K. Sun, Y. Chen, Z. Liu, Y. Chen, Y. Pan, R. Zhao, Y. Liu, C. Liu. *J. Mater. Chem. A*, 2019, **7**, 16793.
- [4] T. Liu, L. Xie, J. Yang, R. Kong, G. Du, A. M. Asiri, X. Sun, L. Chen. *ChemElectroChem*, 2017, **4**, 1840.
- [5] Y. Zhao, S. Chen, B. Sun, D. Su, X. Huang, H. Liu, Y. Yan, K. Sun, G. Wang, *Sci. Rep.*, 2015, **5**, 7629.
- [6] J. Liu, D. Zhu, T. Ling, A. Vasileff, S. Qiao. *Nano Energy*, 2017, **40**, 264.
